# Supplementary material for: Crystal Structure of Human Herpesvirus 6B Tegument Protein U14
Source: PLoS Pathog. 2016 May 6;12(5):e1005594. doi: 10.1371/journal.ppat.1005594 (PMC4859480; doi:10.1371/journal.ppat.1005594)
Supplement: S1 Table — (DOCX) [file ppat.1005594.s001.docx]

**S1 Table.** **Summary of the hydrogen bonds at the dimer interface**

| Interaction sitea | Molecule 1 | | | Molecule 2 | | |
| --- | --- | --- | --- | --- | --- | --- |
| Subdomain | Residueb | Group | Subdomain | Residueb | Group |
| Site a | SD4 | D365 (η2) | Oδ1 | SD3 | S150 (α7) | Oγ |
|  | SD4 | D365 (η2) | Oδ2 | SD3 | K154 (α7) | Nζ |
|  | SD4 | E367 (η2–η3) | O | SD3 | K151 (α7) | Nζ |
|  | SD4 | Y368 (η2–η3) | O | SD3 | H143 (α6-α7) | Nε2 |
|  | SD4 | E370 (η2–η3) | O | SD3 | N145 (α6-α7) | Nδ2 |
| Site b | SD4 | Q376 (η3) | O | SD2 | R254 (α10) | Nη1 |
|  | SD4 | D378 (η3–η4) | O | SD2 | R254 (α10) | Nη1 |
|  | SD4 | R381 (η3–η4) | O | SD2 | R254 (α10) | Nη2 |
|  | SD4 | D383 (η3–η4) | Oδ1, Oδ2 | SD2 | R255 (α10) | Nη1, Nε |
|  | SD4 | D388 (η4–η5) | Oδ2 | SD2 | R255 (α10) | Nη1 |
|  | SD4 | D390 (η4–η5) | Oδ2 | SD1 | Q57 (α3) | Nε2 |
| Site c | SD2 | R75 (α4) | Nη2 | SD1 | E60 (α3) | O |
|  | SD2 | R75 (α4) | Nη2 | SD1 | Q61 (α3) | O |
|  | SD2 | D76 (α4) | Oδ2 | SD2 | R83 (α4) | Nη2 |
|  | SD4 | S332 (α13) | Oγ | SD2 | W259 (α19) | Nε1 |
| Site d | SD4 | T413 (β1) | O | SD2 | N296 (α11) | Nδ2 |
|  | SD4 | N419 (β1-β2) | Nδ2 | SD4 | I403 (η5-β1) | O |
|  | SD4 | N419 (β2) | O | SD4 | A404 (η5-β1) | N |
|  | SD4 | I421 (β2) | N | SD4 | I405 (η5-β1) | O |

aOnly one of the two symmetrical interaction sites were listed here, thus the total number of hydrogen bonds is twice in the homodimer.

bThe locations in secondary structure diagram were shown in the parentheses.
